# Supplementary material for: Survey of Protein Sequence Embedding Models
Source: MDPI journal article supplement (doi:10.3390/ijms24043775), 2023-02-14

**Supplementary material S2.** Distributions of amino acid compositions (Eq. 1) in the subsets of the *Saccharomyces cerevisiae* (S288C) proteome.

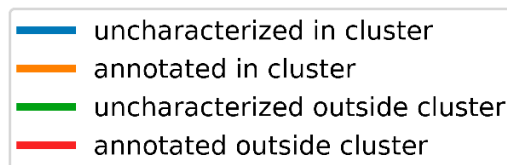

A, Ala

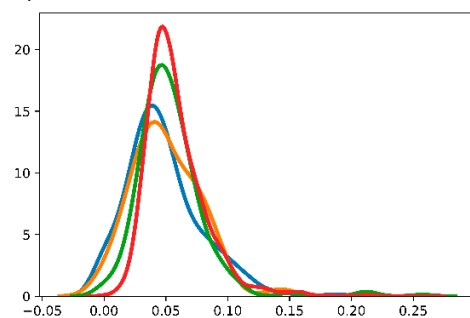

M, Met

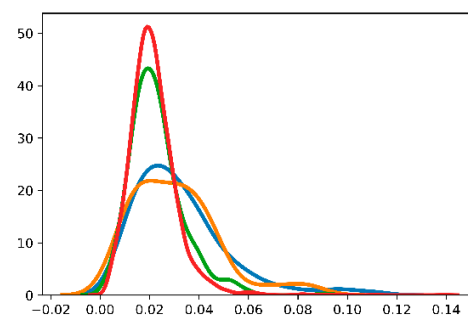

C, Cys

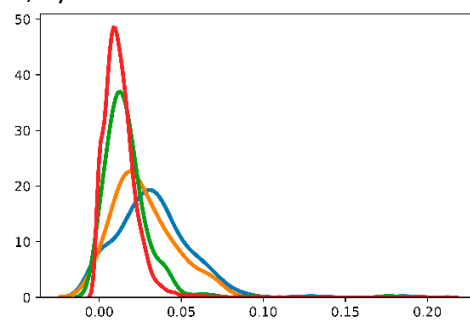

N, Asn

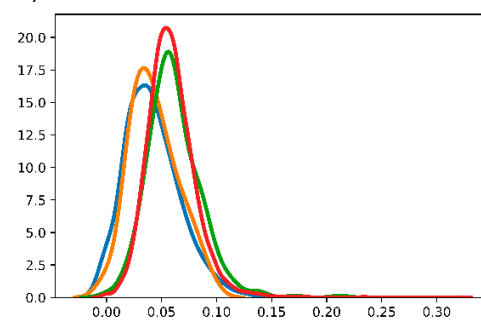

D, Asp

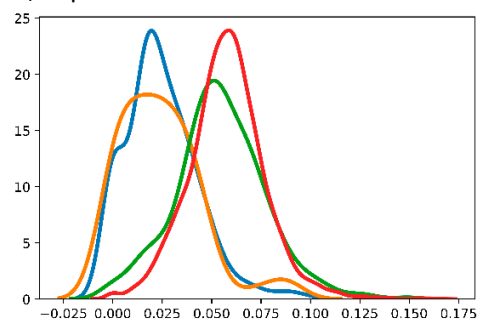

P, Pro

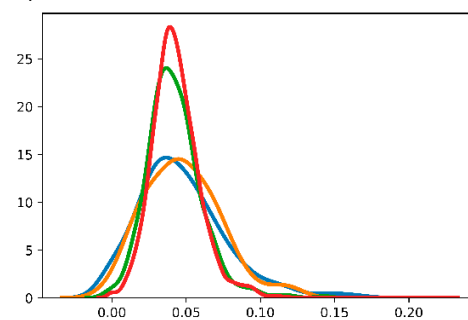

E, Glu

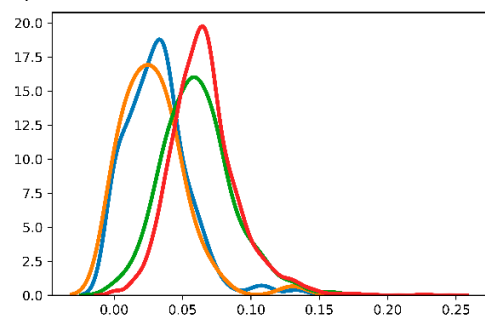

Q, Gln

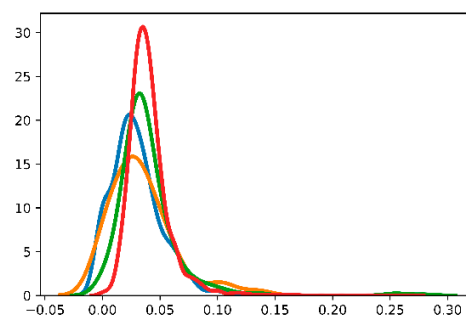

F, Phe

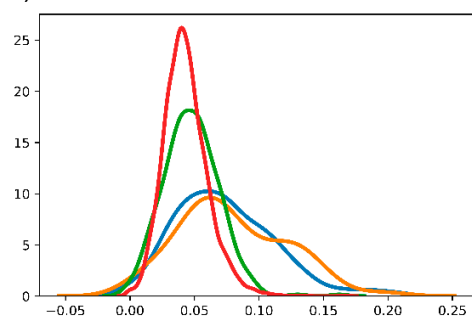

R, Arg

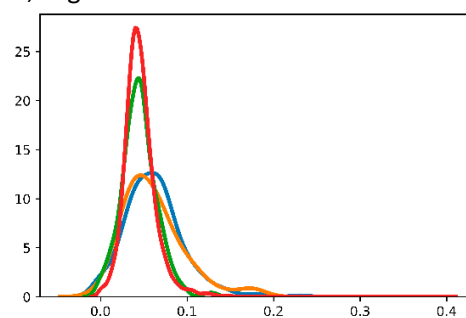

G, Gly

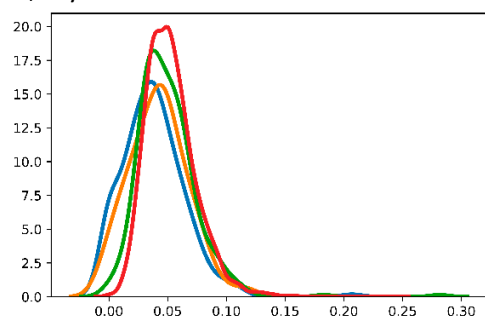

S, Ser

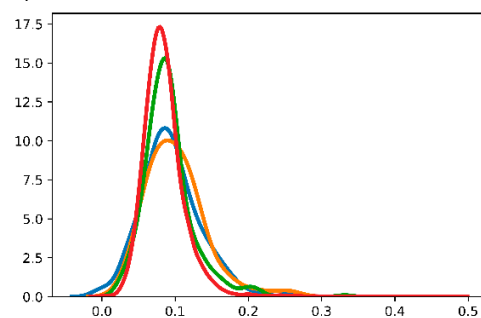

H, His

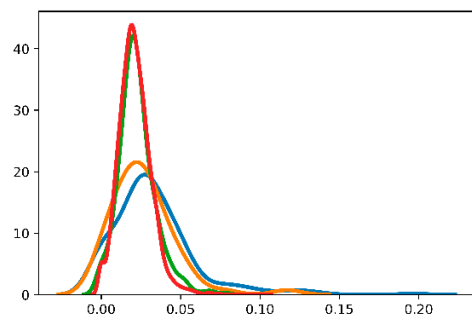

T, Thr

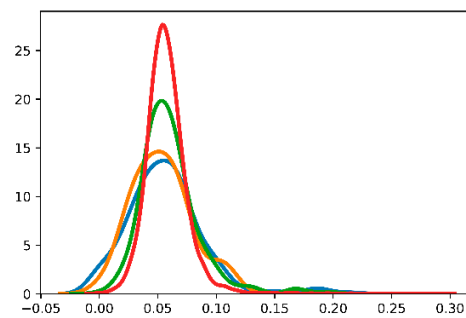

I, Ile

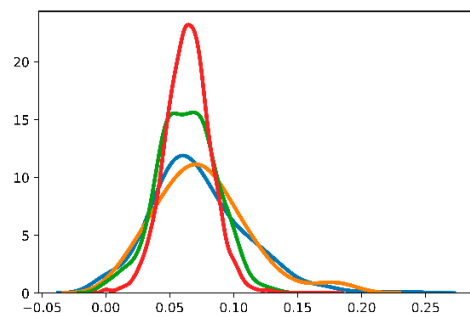

V, Val

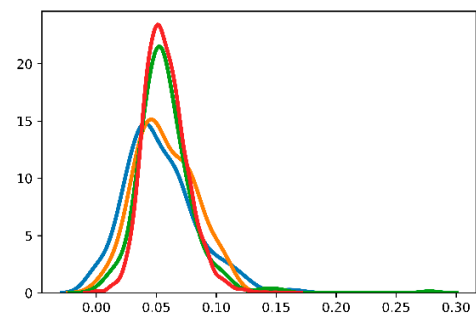

K, Lys

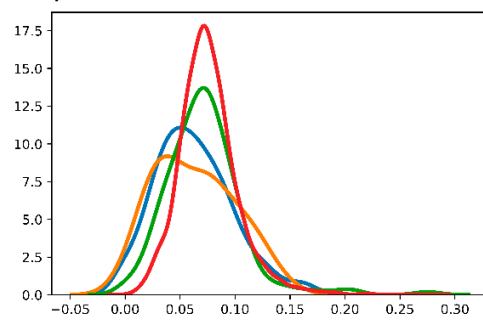

W, Trp

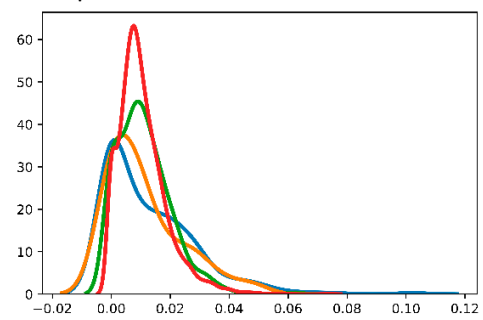

L, Leu

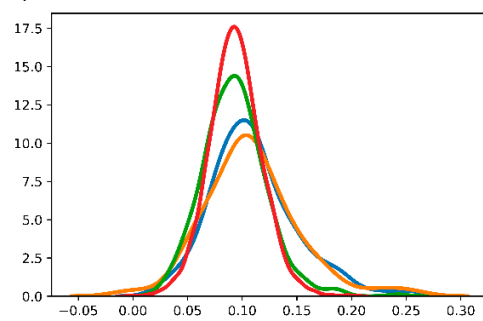

Y, Tyr

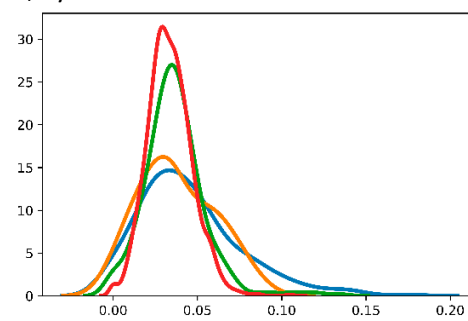

Supplement: s1 [file s1]
