# Supplementary figures and images for: Survey of Protein Sequence Embedding Models
Source: MDPI journal article supplement (doi:10.3390/ijms24043775), 2023-02-14

Supplementary material S4. Distributions of COG categories of virulence factors.

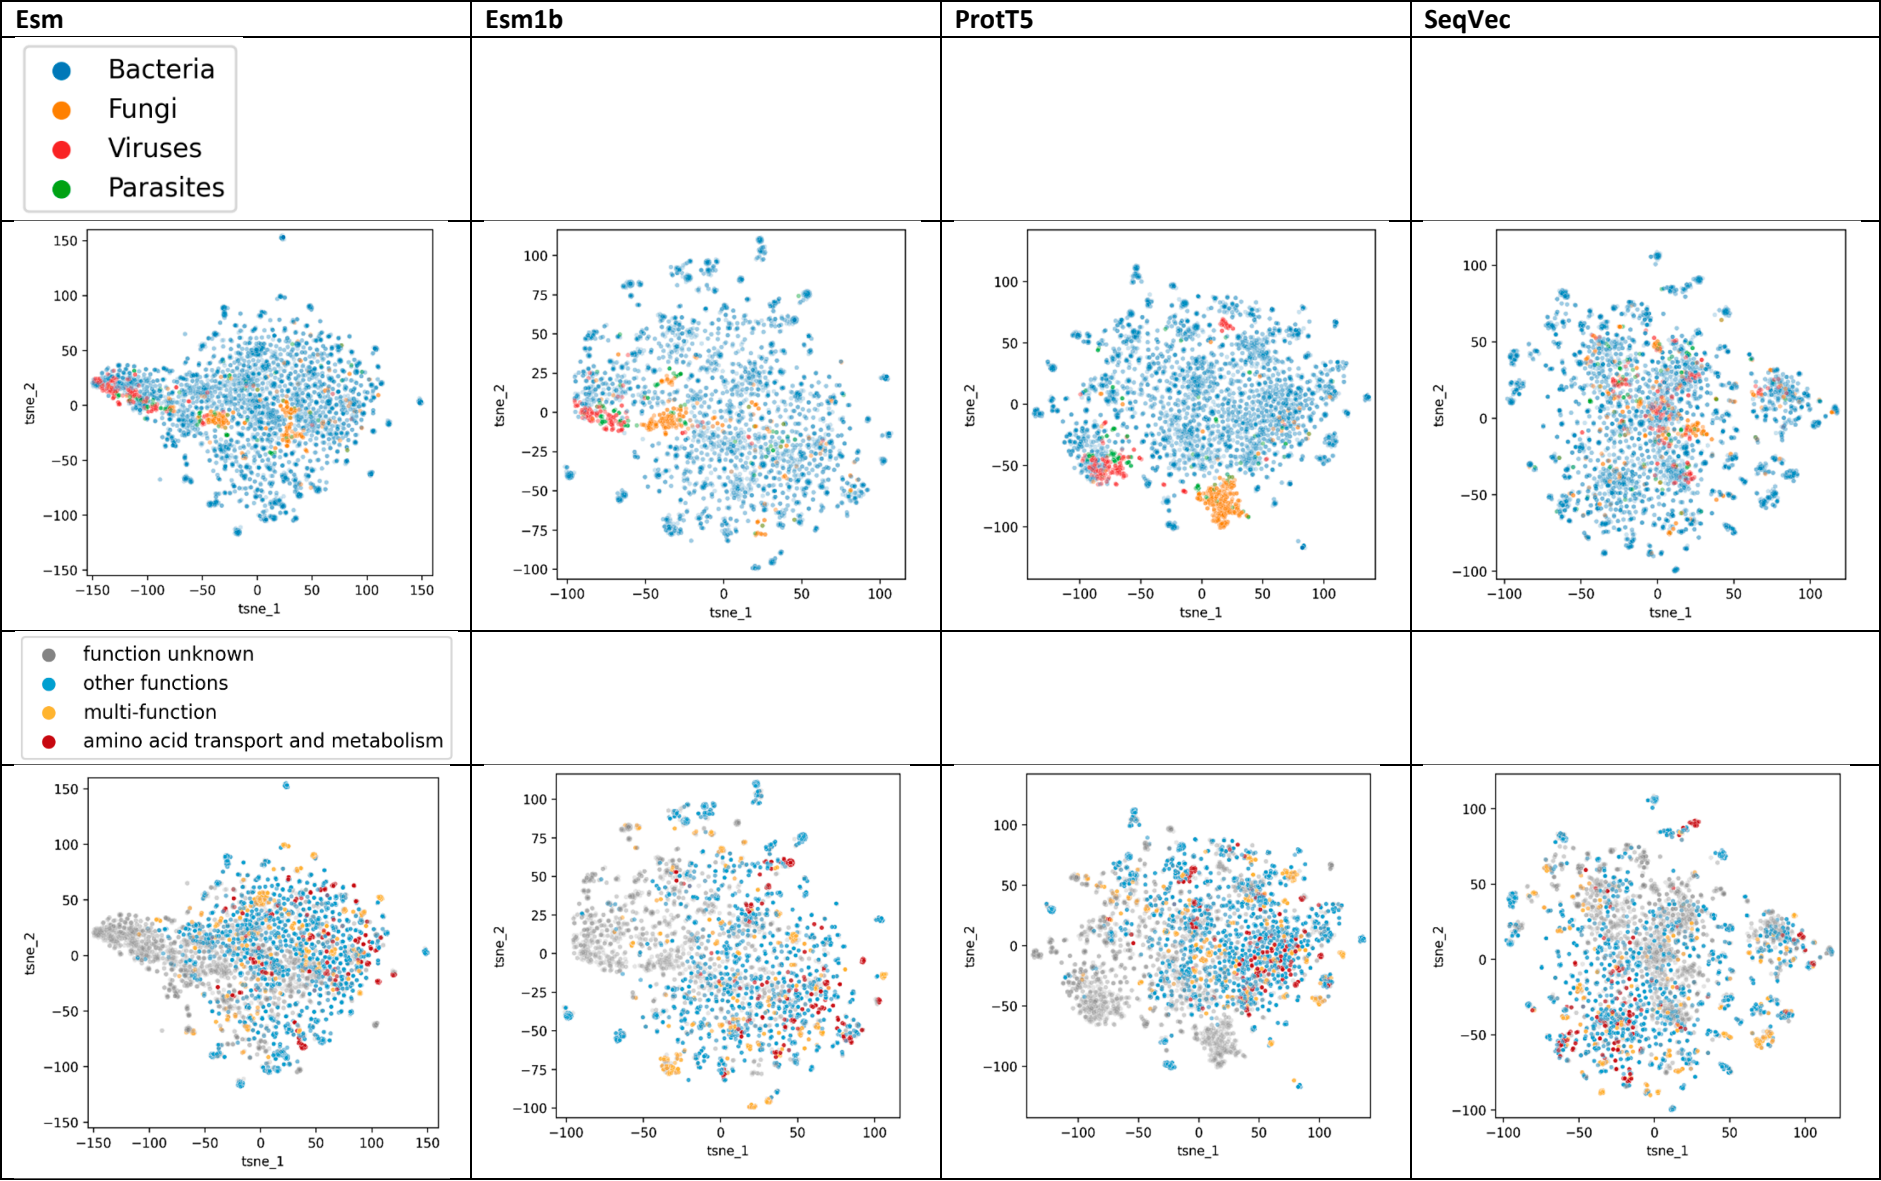

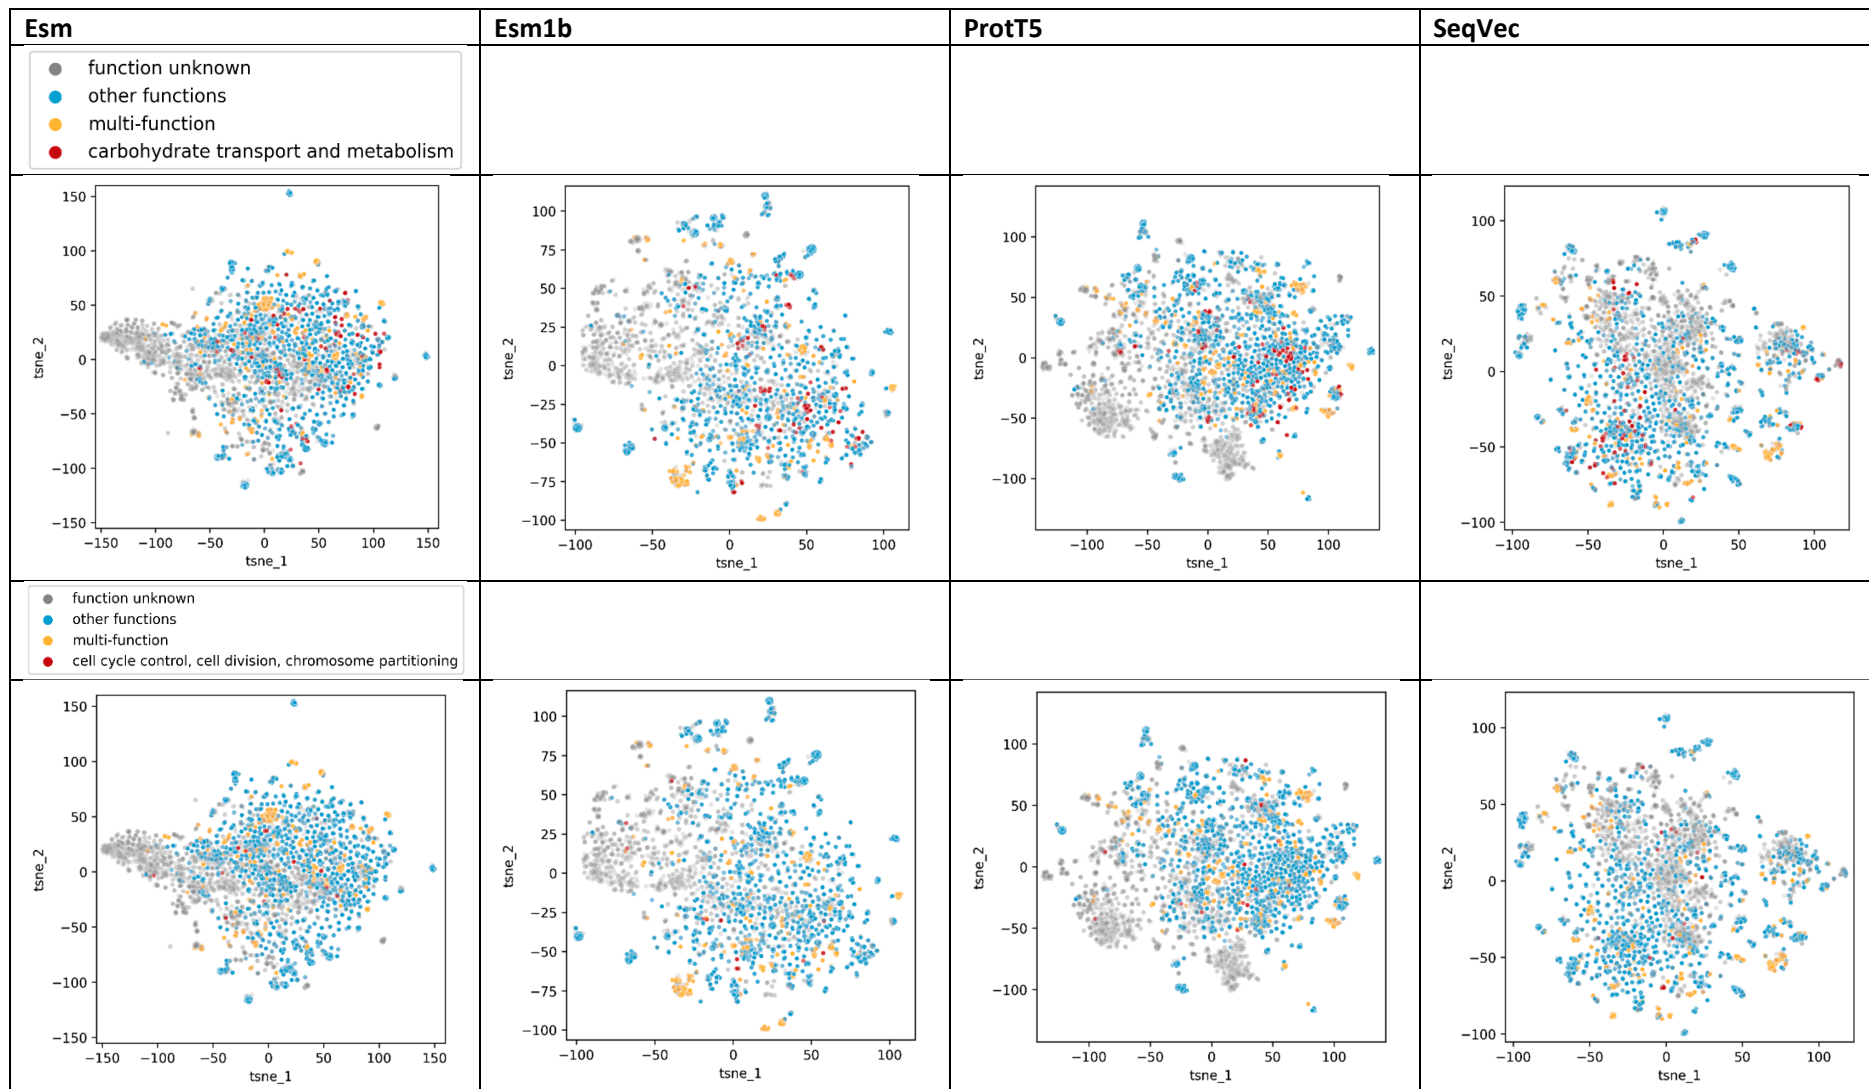

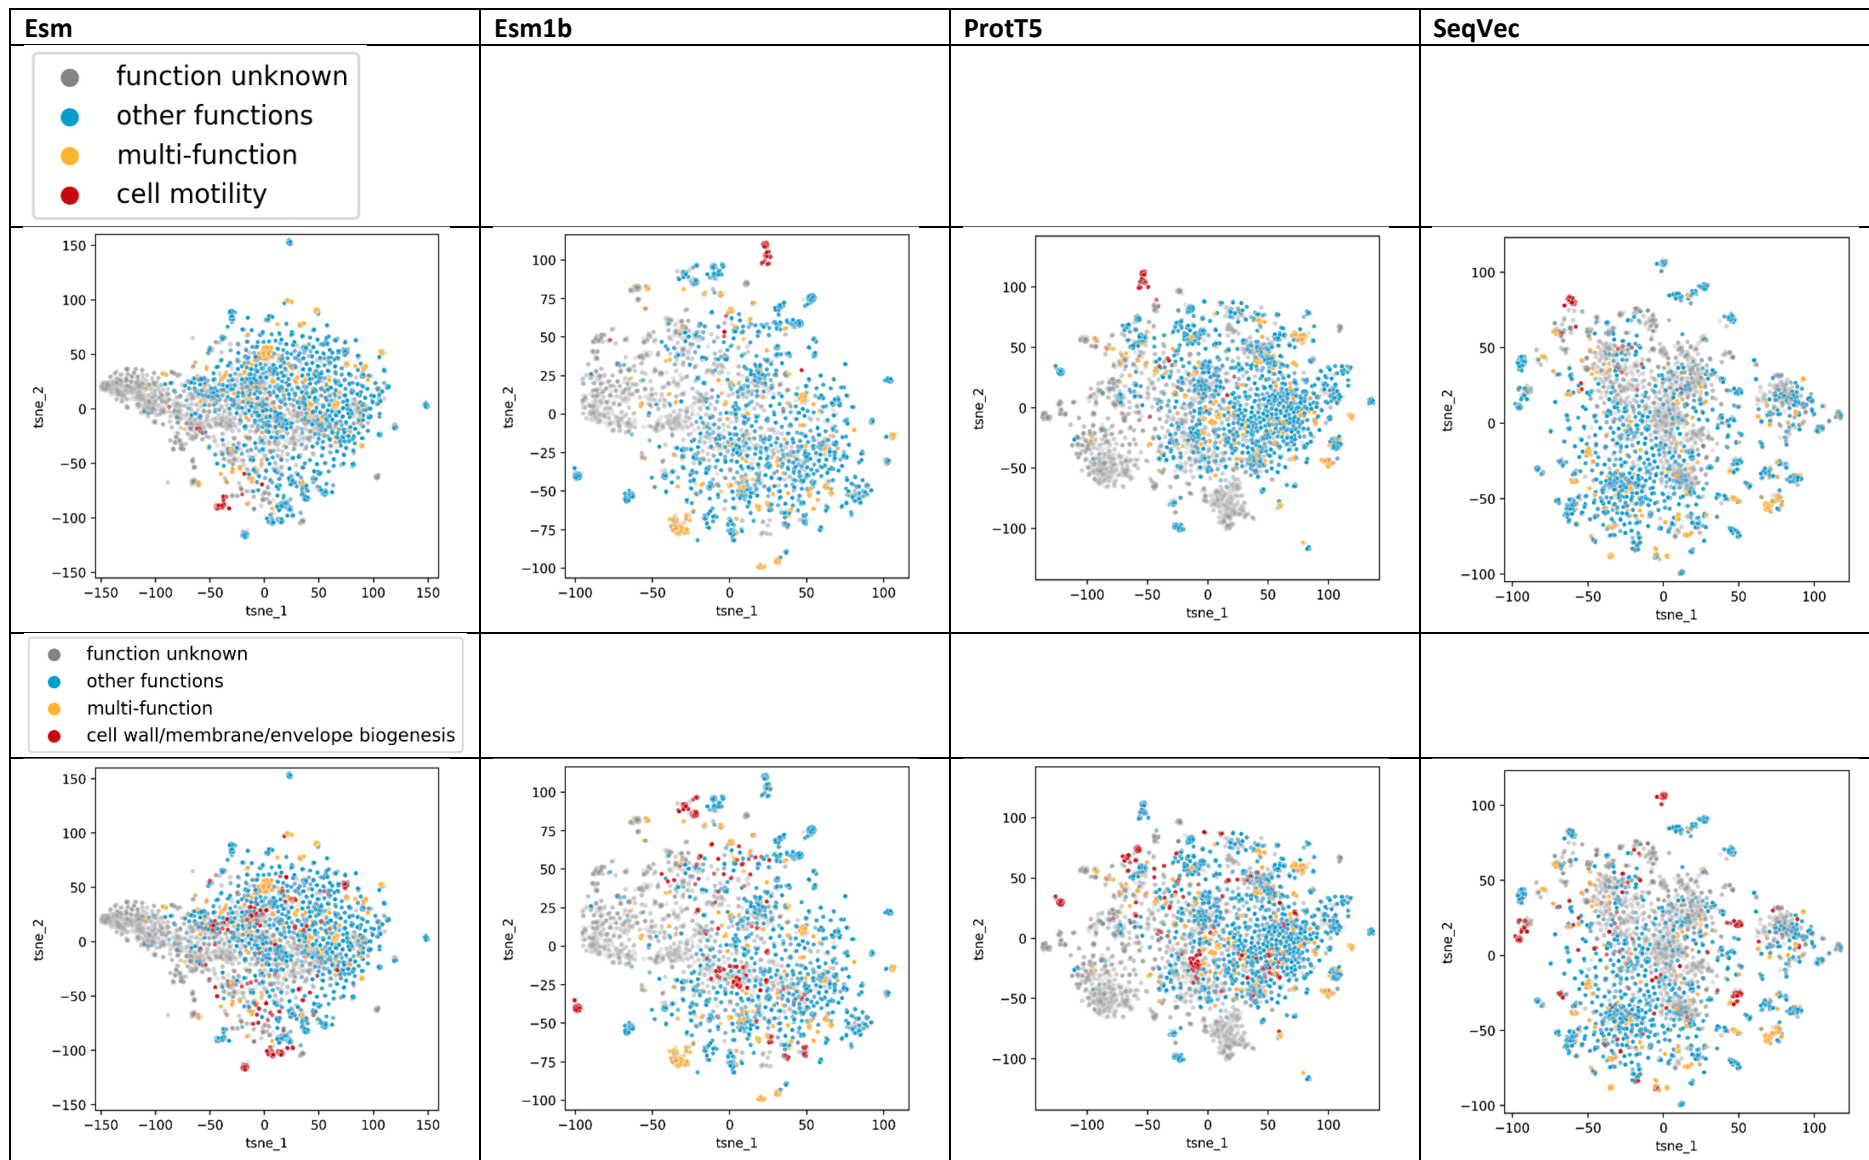

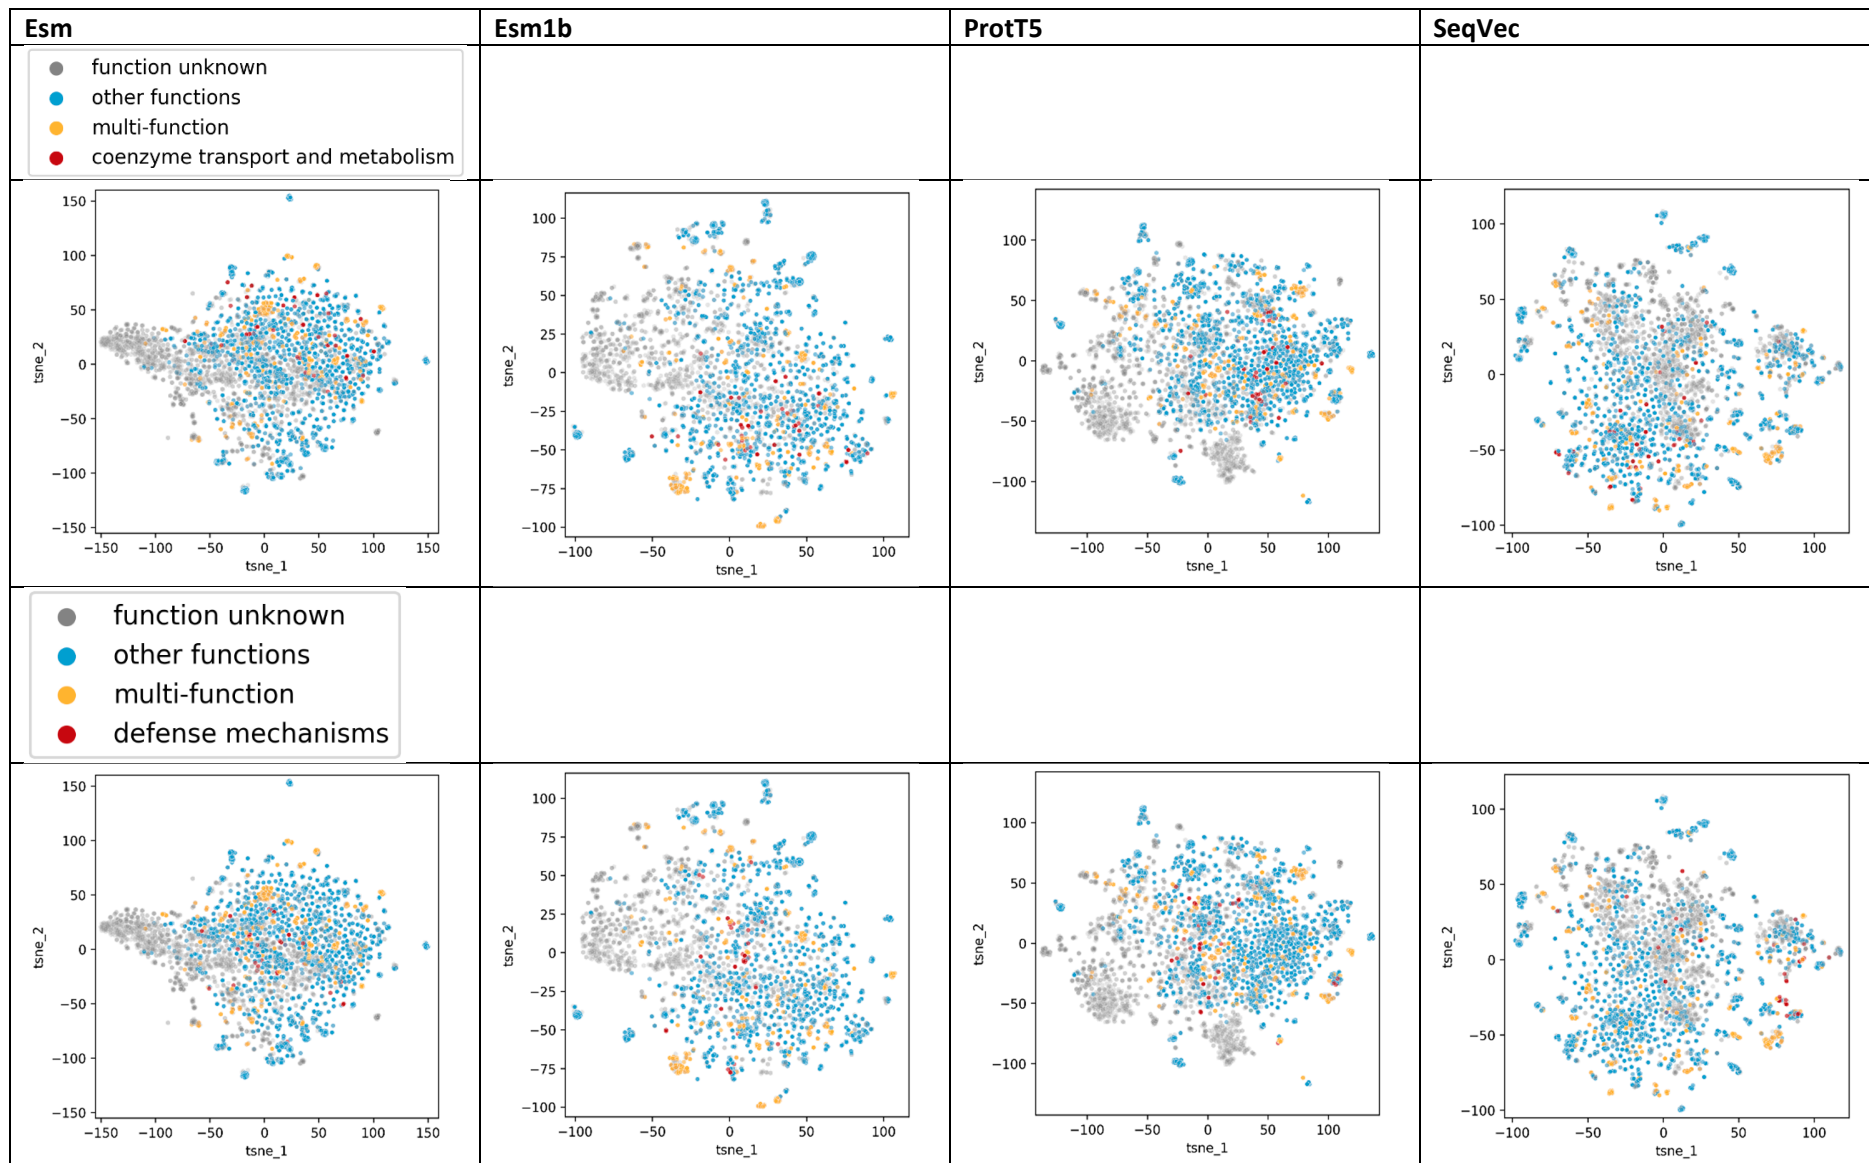



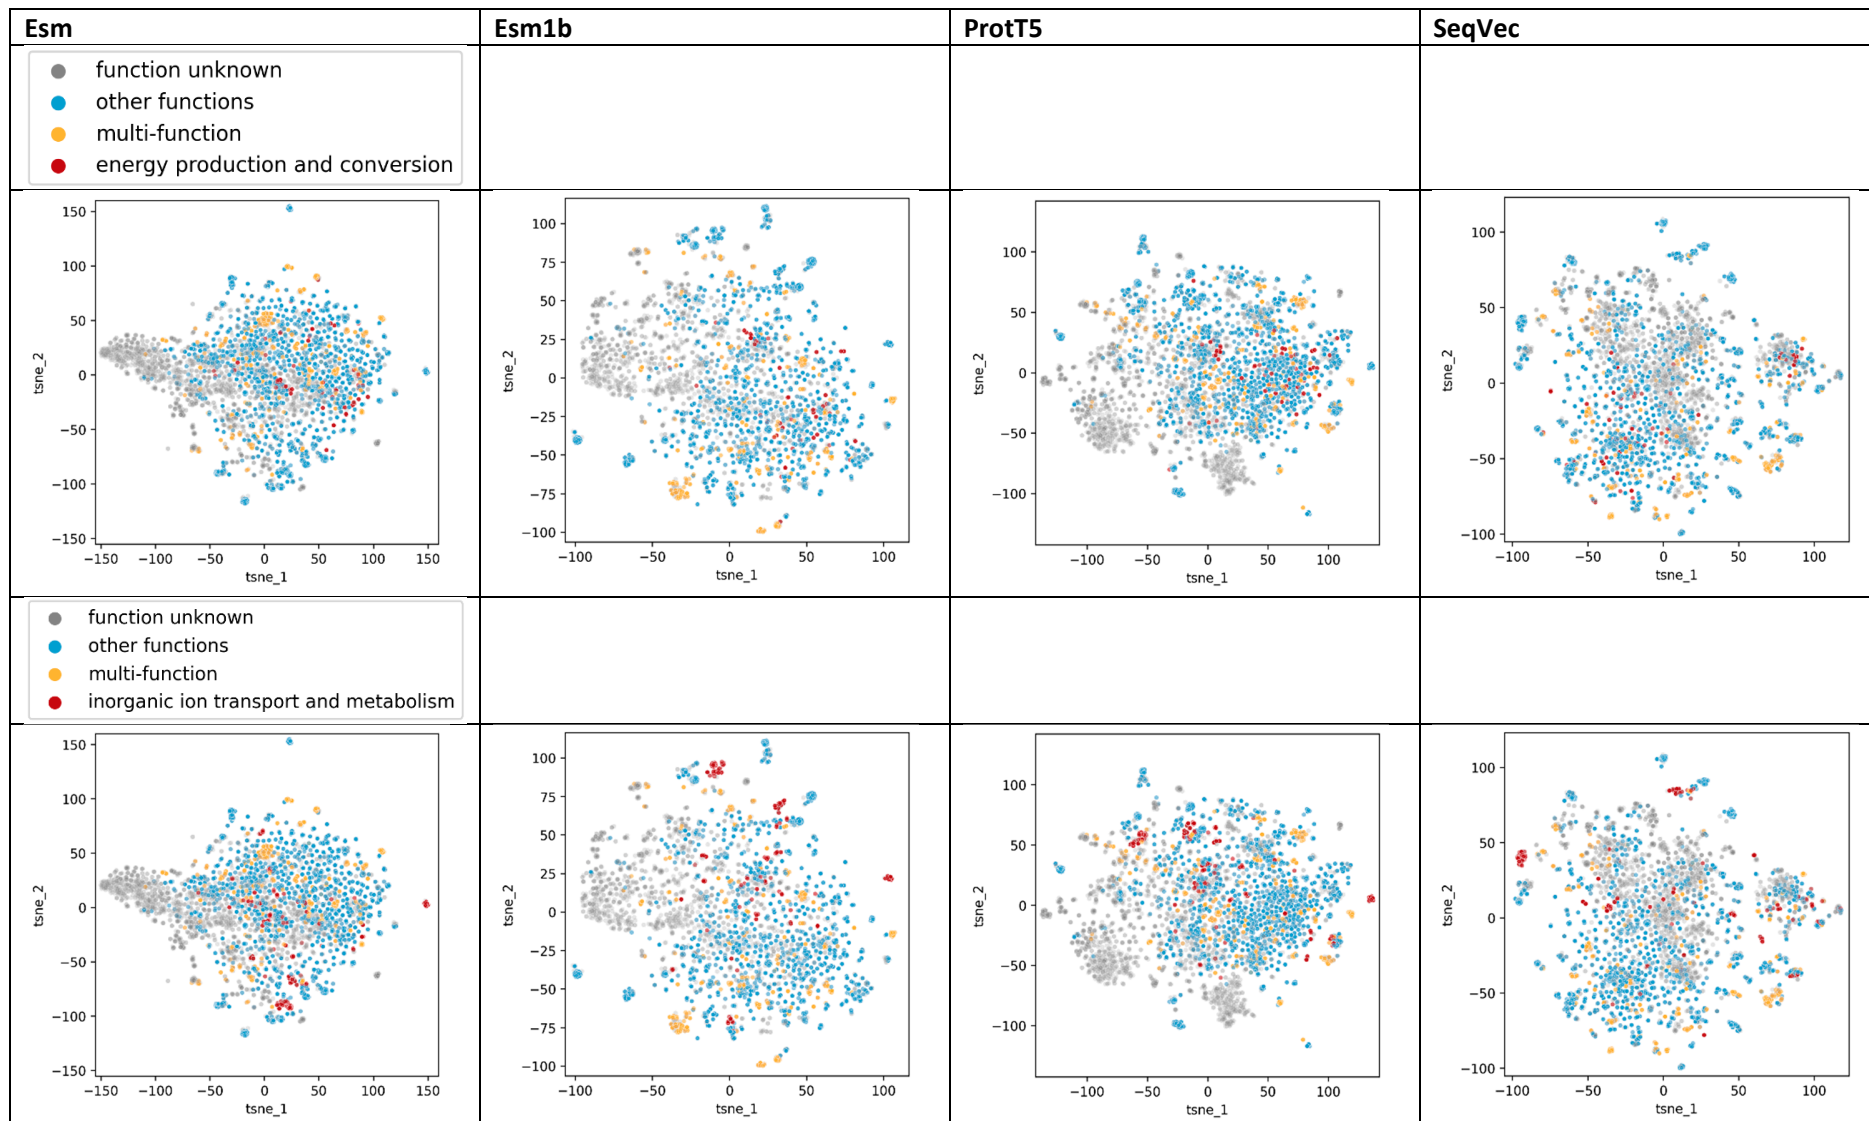

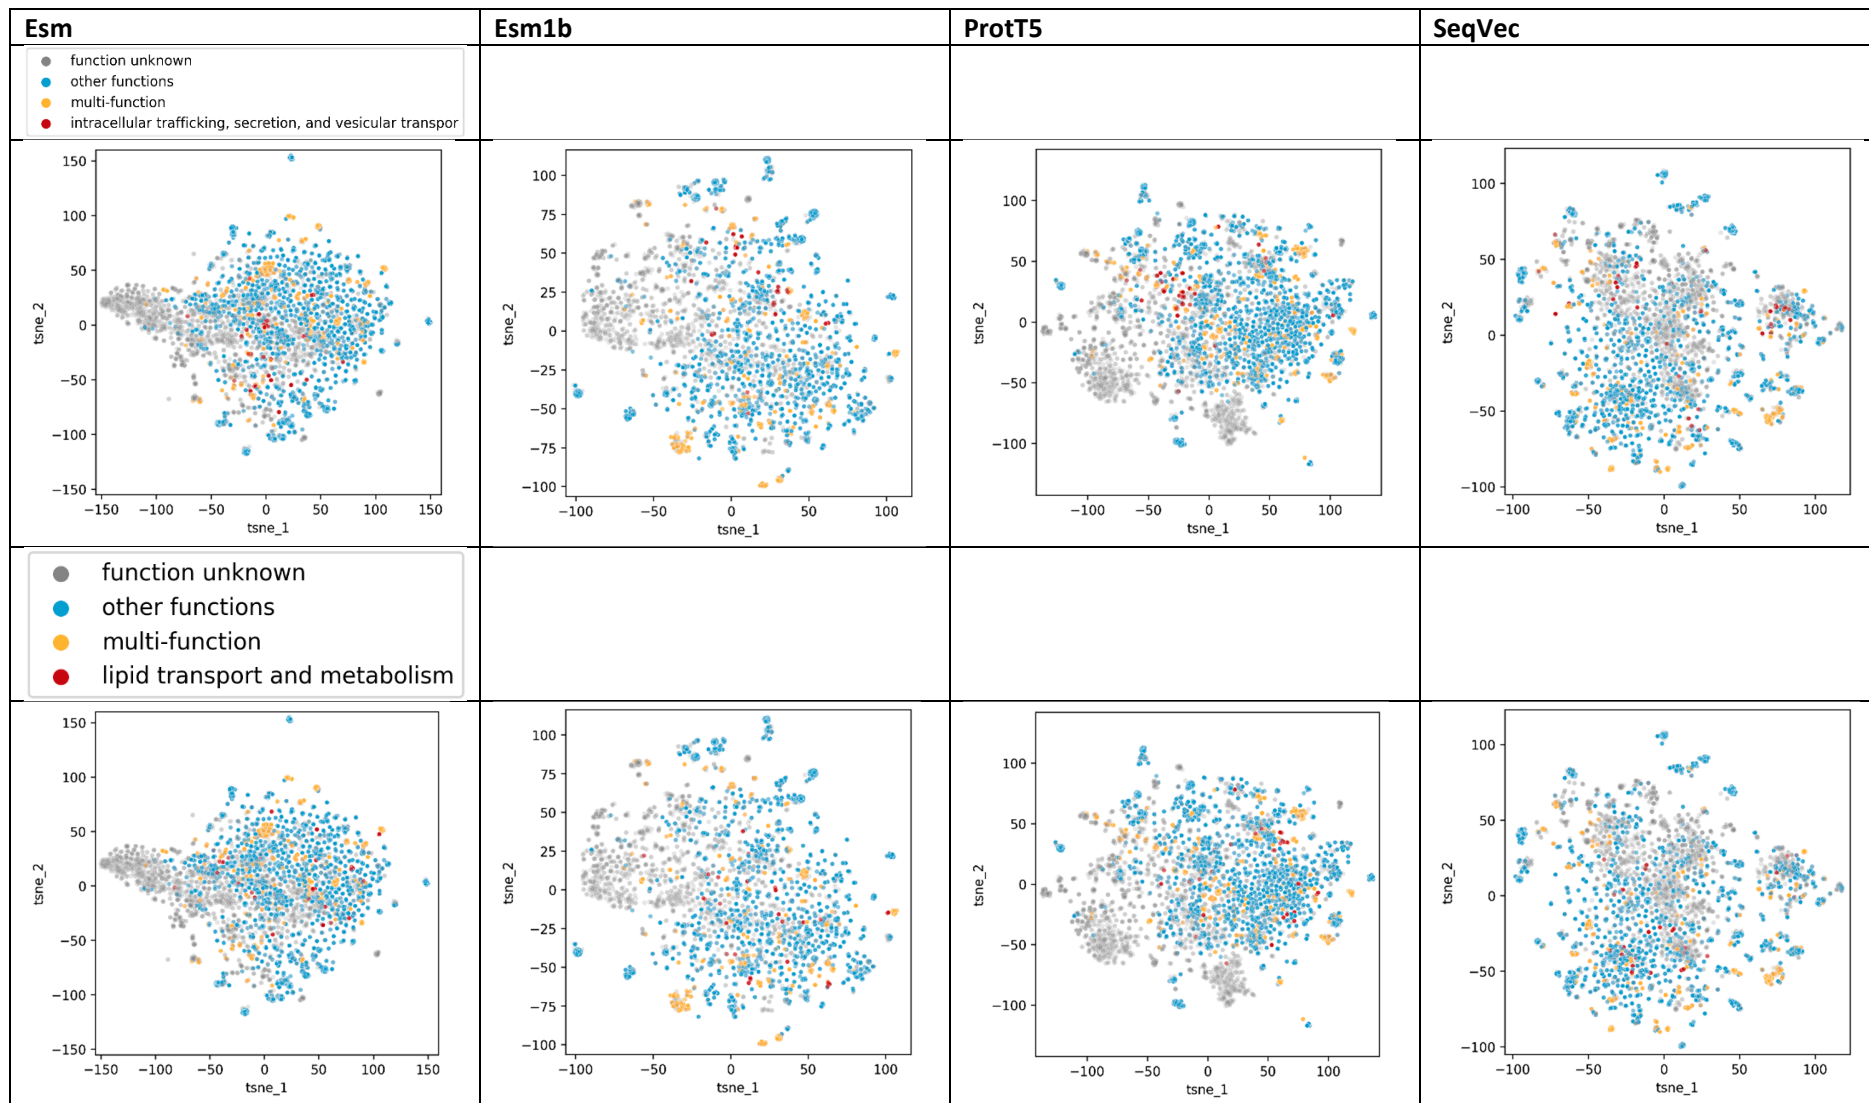

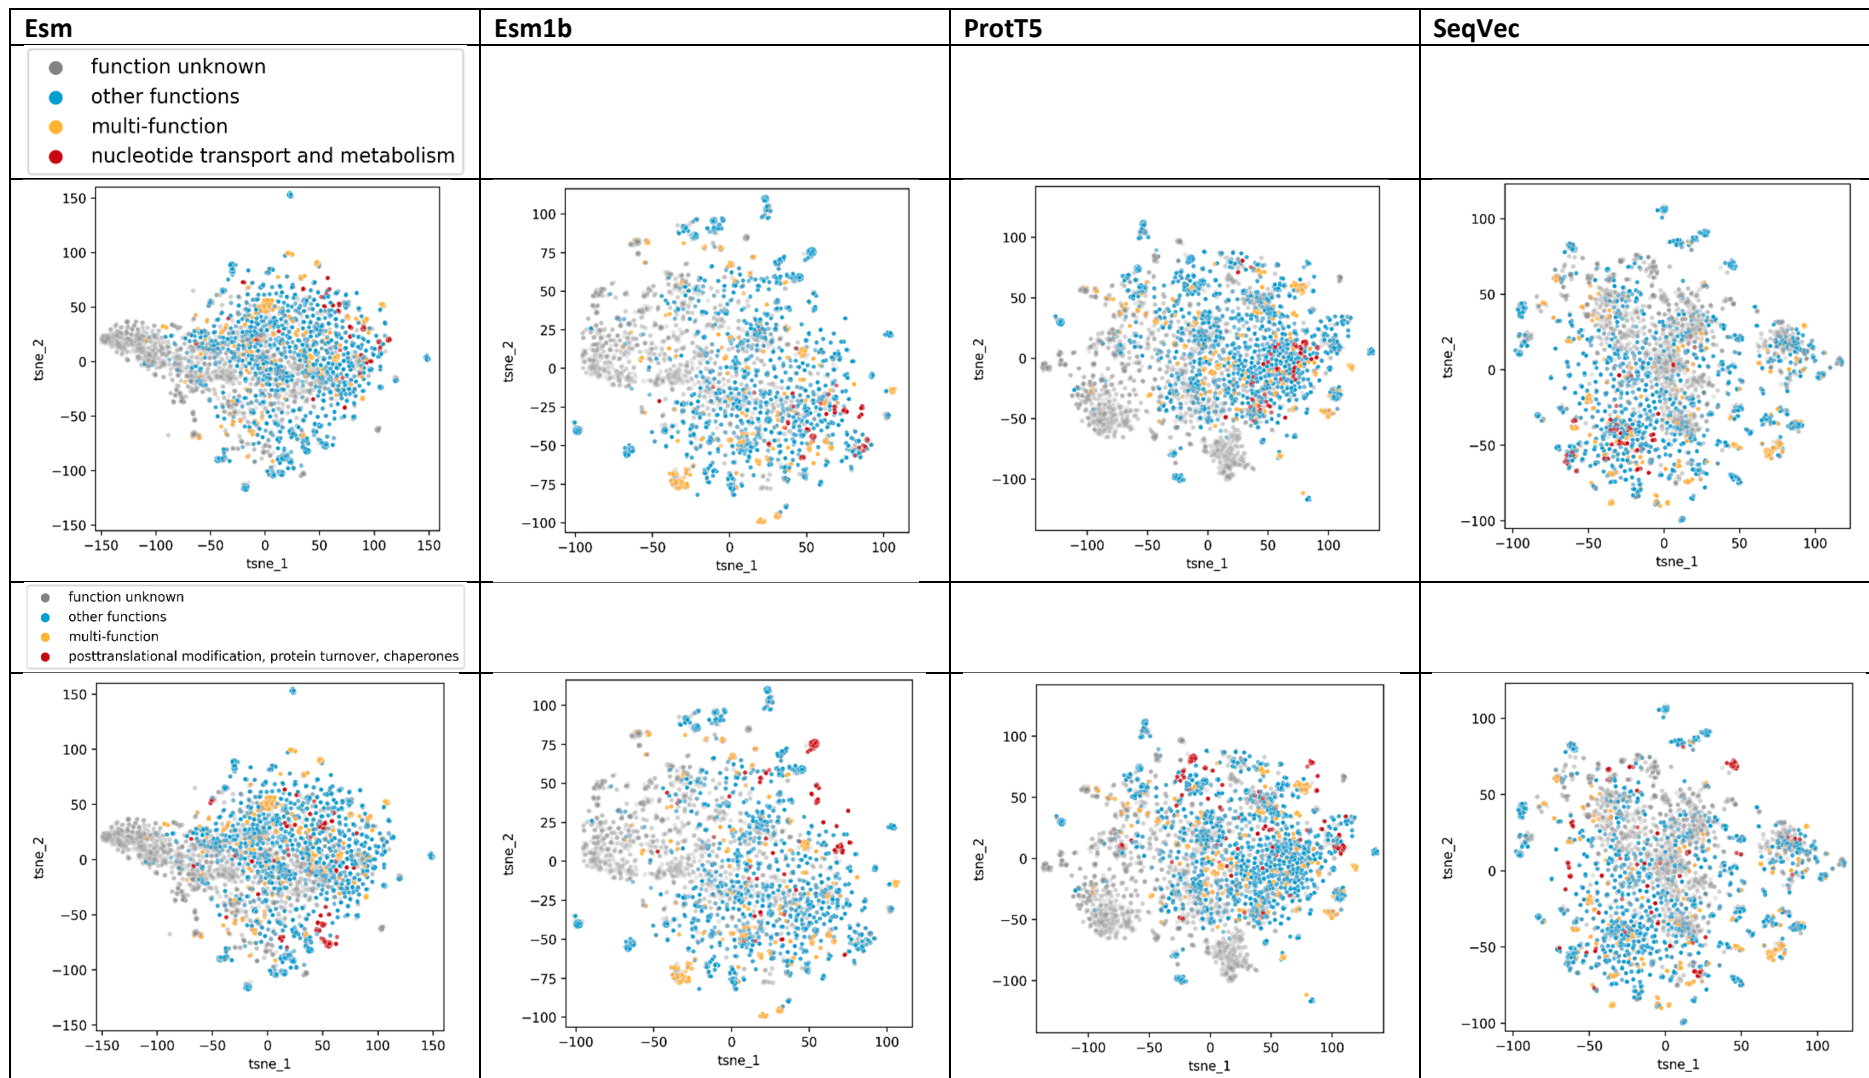

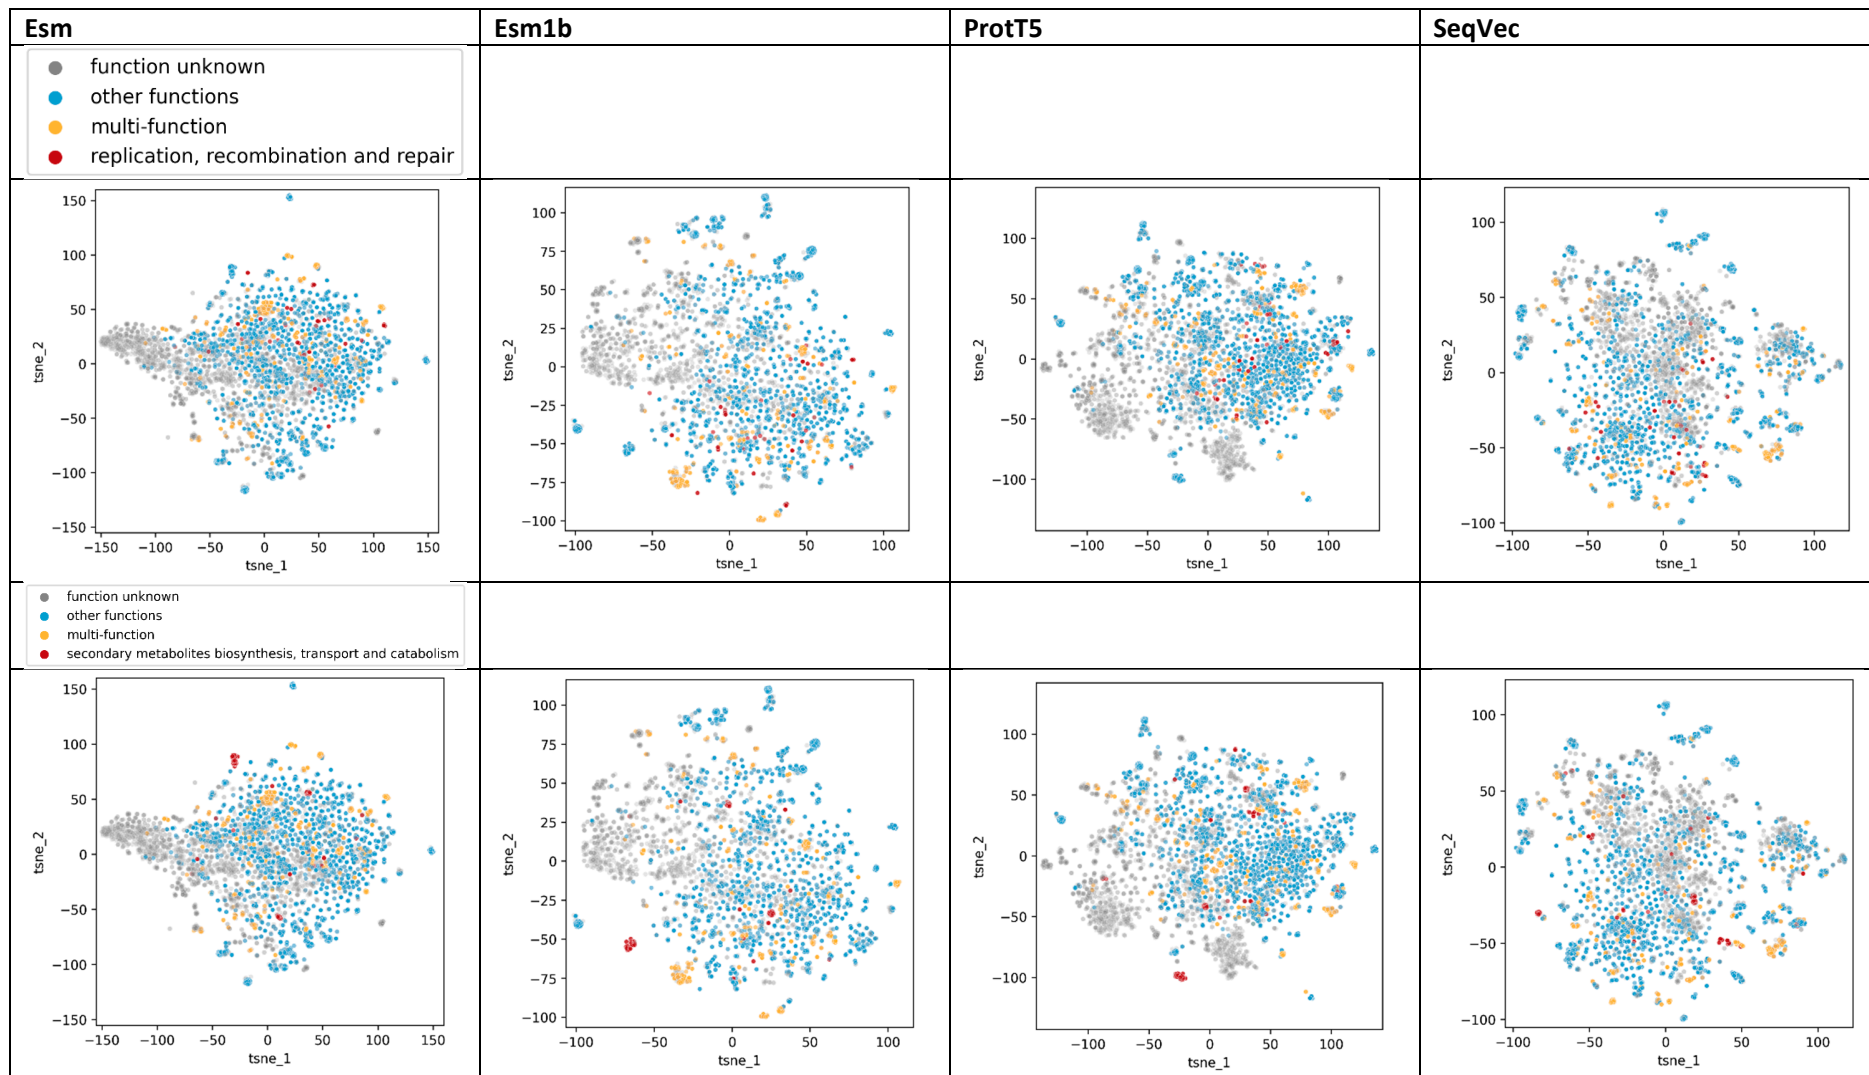



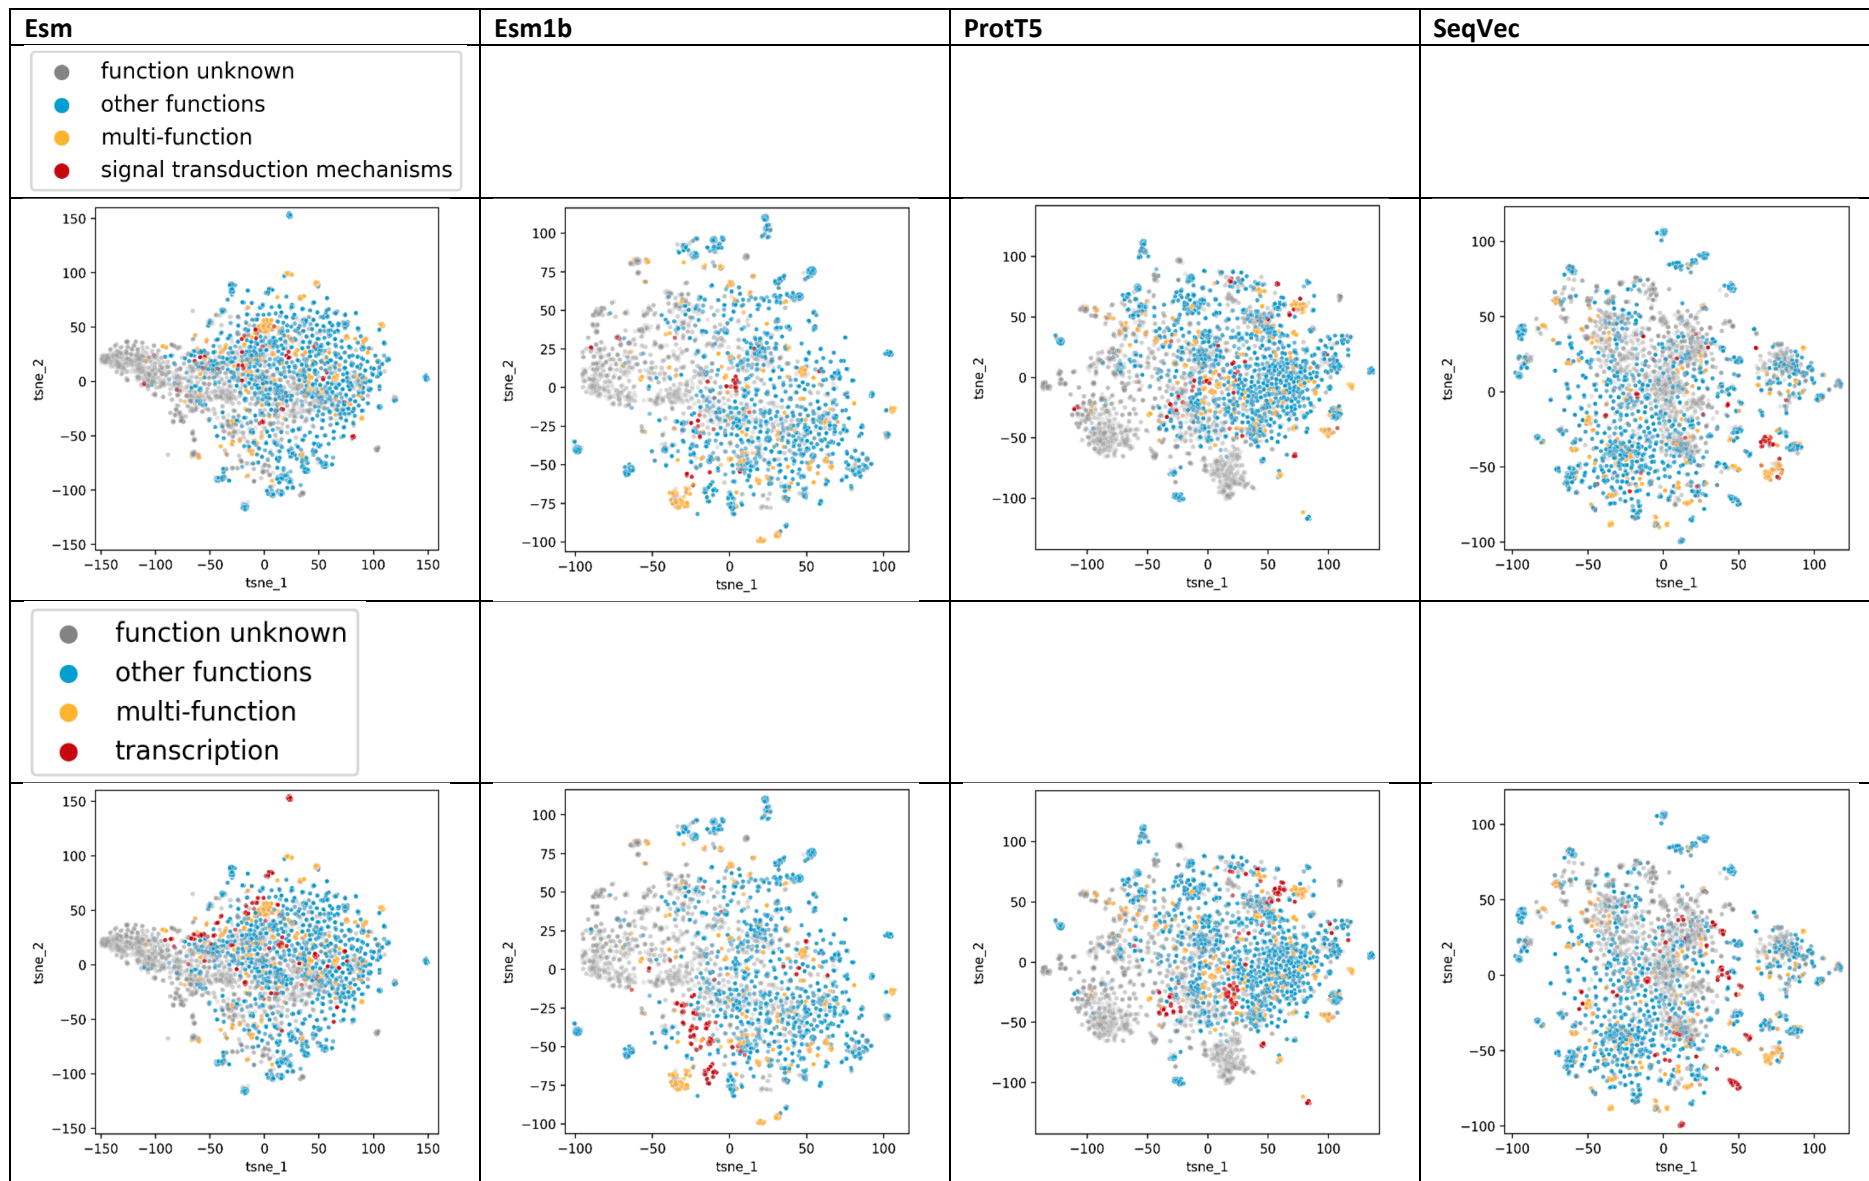

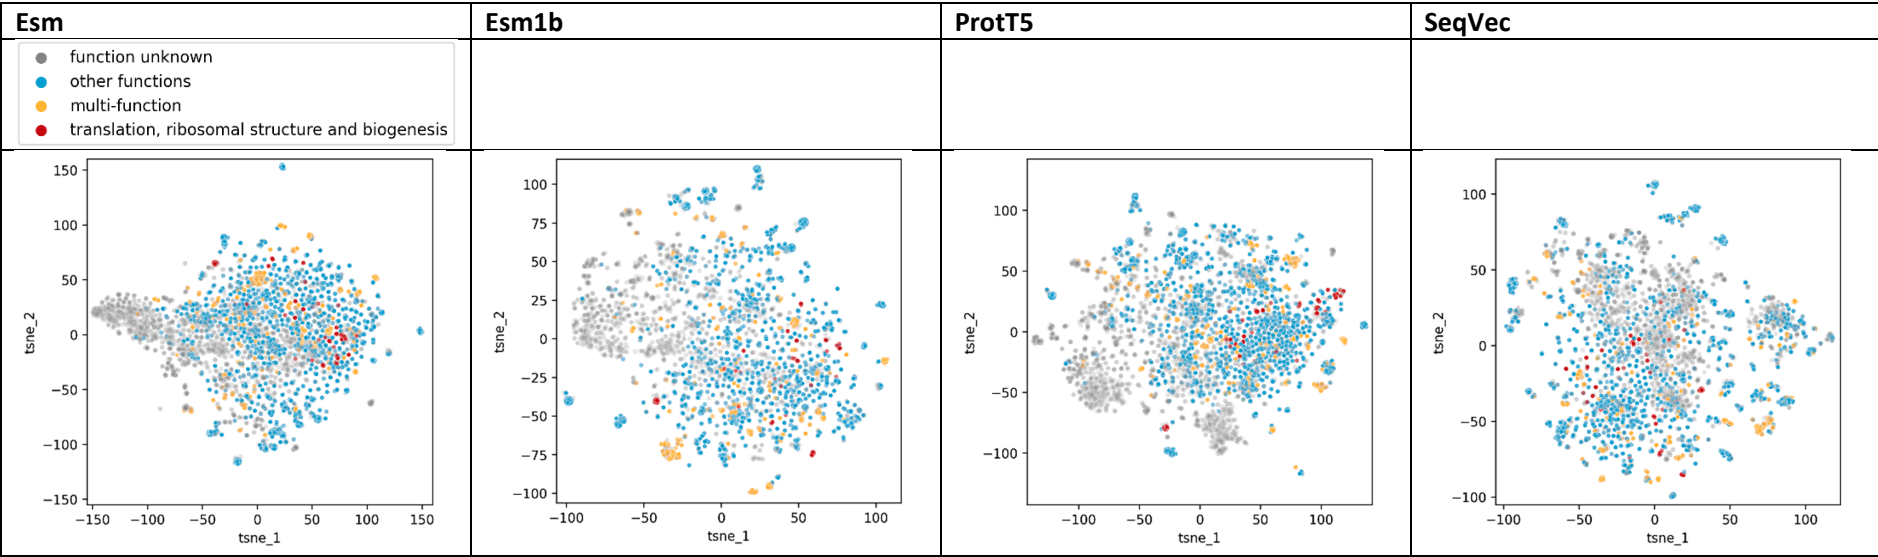

Supplement: s1 [file s1]
